# Supplementary material for: Intersecting Conservation and Climate Change: Community-Based Management of Large Mammals in the Hunza Highlands, Pakistan
Source: Research Square preprint supplement (doi:10.21203/rs.3.rs-6687579/v1), 2025-08-19
Supplement: Supplementary file 1 [file 3c9e6ee519fbac02f10bc612.pdf]

# Survey Questionnaire: Human-Wildlife Interactions in Hunza Highlands

*(Community-Based Conservation & Climate Change Study)*

## Section 1: Participant Information

1. Village/Location: \_\_\_\_\_
2. Age group:  
☐ 18-30 ☐ 31-45 ☐ 46-60 ☐ 60+
3. Primary occupation:  
☐ Farming ☐ Livestock herding ☐ Tourism ☐ Other: \_\_\_\_\_

## Section 2: Wildlife Observations

4. Have you noticed changes in these species' populations over the past 10 years?

| Species          | Increased                | Decreased                | No Change                | Don't Know               |
|------------------|--------------------------|--------------------------|--------------------------|--------------------------|
| Himalayan Ibex   | <input type="checkbox"/> | <input type="checkbox"/> | <input type="checkbox"/> | <input type="checkbox"/> |
| Snow Leopard     | <input type="checkbox"/> | <input type="checkbox"/> | <input type="checkbox"/> | <input type="checkbox"/> |
| Marco Polo Sheep | <input type="checkbox"/> | <input type="checkbox"/> | <input type="checkbox"/> | <input type="checkbox"/> |

5. How often do you encounter wildlife near your village?  
☐ Daily ☐ Weekly ☐ Monthly ☐ Rarely

## Section 3: Human-Wildlife Conflict

6. Have you experienced conflicts with wildlife in the past 2 years?  
☐ Yes (describe: \_\_\_\_\_) ☐ No
7. What type of conflict? (Check all that apply)  
☐ Livestock predation ☐ Crop damage ☐ Property damage ☐ Other: \_\_\_\_\_

## Section 4: Climate Change Perceptions

8. Have you observed these climate-related changes?

| Change                 | Yes                      | No                       |
|------------------------|--------------------------|--------------------------|
| Later snowfall         | <input type="checkbox"/> | <input type="checkbox"/> |
| Unpredictable rainfall | <input type="checkbox"/> | <input type="checkbox"/> |
| Glacier retreat        | <input type="checkbox"/> | <input type="checkbox"/> |

### Section 5: Conservation Feedback

9. Do community conservation programs (e.g., KVO/SKIDO) help protect wildlife?

☐ Strongly agree ☐ Agree ☐ Neutral ☐ Disagree ☐ Strongly disagree

10. Suggestions for improvement: \_\_\_\_\_
